# Supplementary material for: Titanate-derived Nb-doped TiO2 nanoparticles displaying improved lithium storage performance
Source: Royal Society of Chemistry journal article supplement (doi:10.1039/d1dt03352b), 2022-01-01
Supplement: d1dt03352b1.pdf [file d1dt03352b1.pdf]

## Supplementary Information

# Nb doped TiO<sub>2</sub> nanoparticles derived from titanate with improved lithium storage performance

Yubin Liu,<sup>\*a</sup> Xiaoyang Pan,<sup>a</sup> Wenjie Chen<sup>a</sup> and Xiaojing Zhao<sup>a</sup>

<sup>a</sup> College of Chemical Engineering and Materials, Quanzhou Normal University, Quanzhou 362000, China

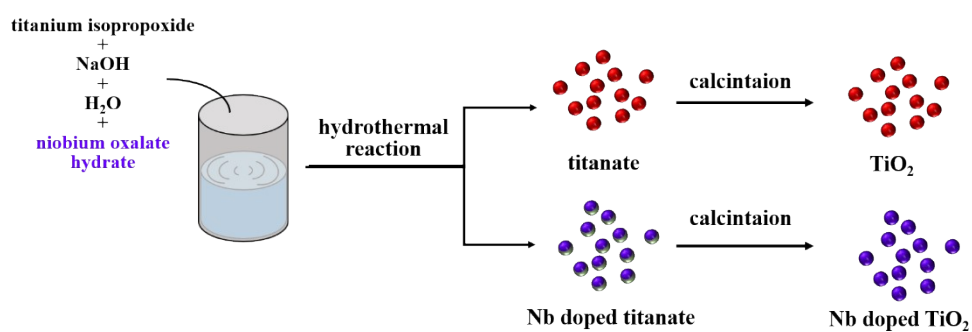

Fig. S1 Schematic illustration of the formation of TiO<sub>2</sub> and Nb doped TiO<sub>2</sub>.

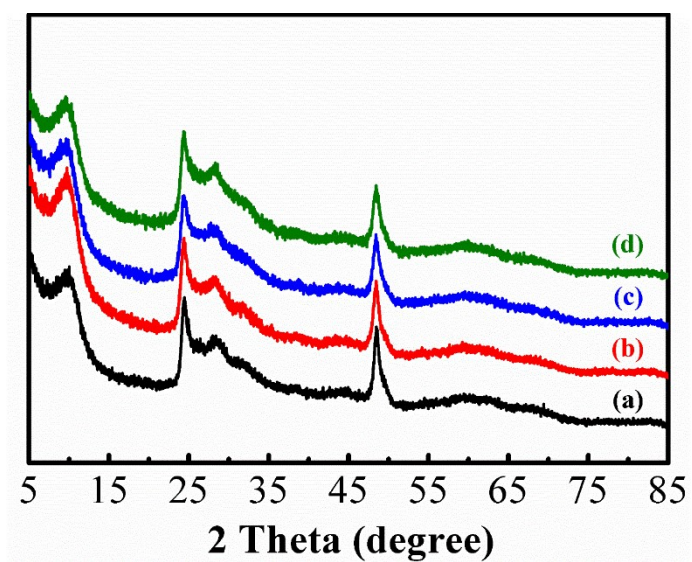

Fig.S2 XRD patterns of (a) titanate, (b) Nb-titanate-0.1, (c) Nb-titanate-0.2 and (d) Nb-titanate-0.4.

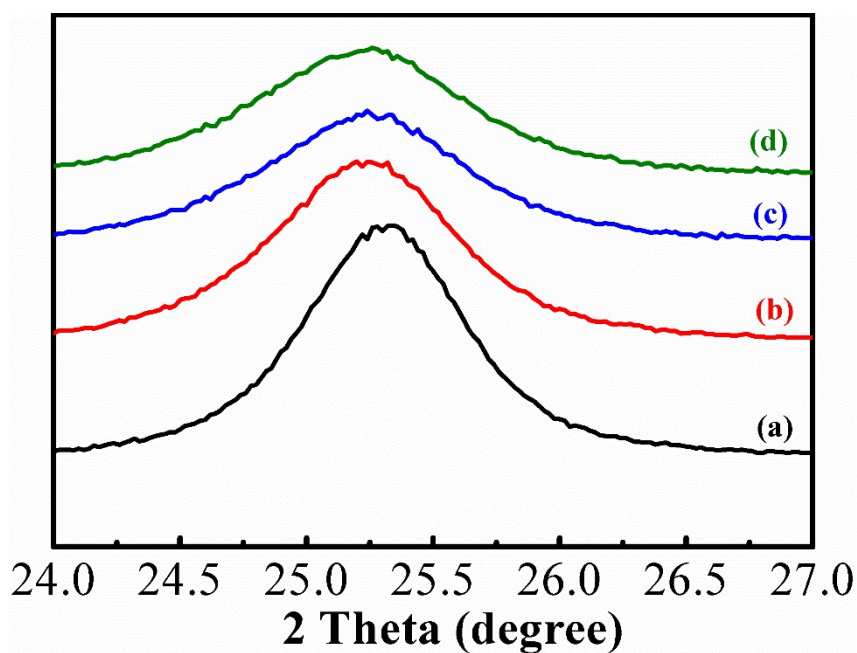

Fig.S3 Magnified XRD patterns of (a)  $\text{TiO}_2$ , (b)  $\text{Nb-TiO}_2\text{-0.1}$ , (c)  $\text{Nb-TiO}_2\text{-0.2}$  and (d)  $\text{Nb-TiO}_2\text{-0.4}$  between  $24^\circ$  and  $27^\circ$ .

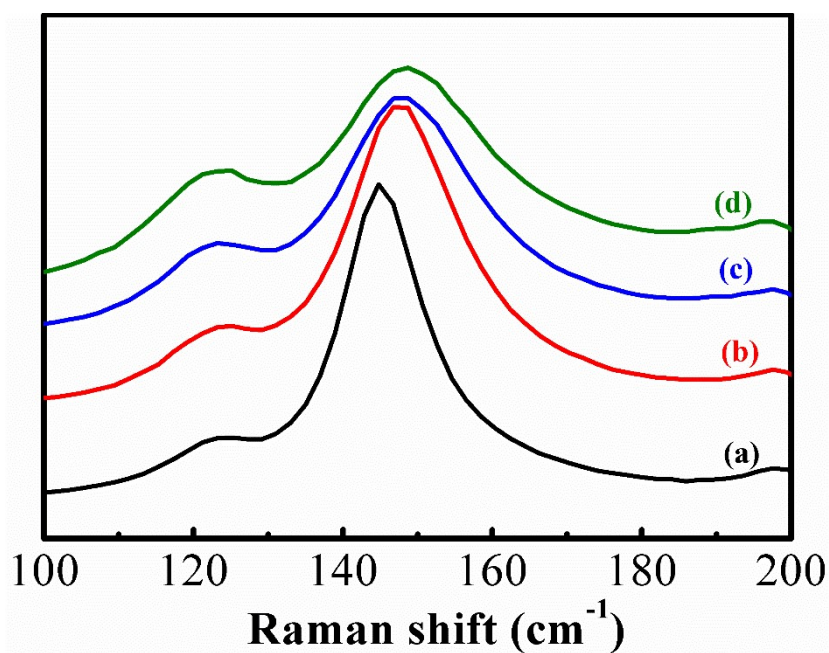

Fig.S4 Magnified Raman spectra of (a)  $\text{TiO}_2$ , (b)  $\text{Nb-TiO}_2\text{-0.1}$ , (c)  $\text{Nb-TiO}_2\text{-0.2}$  and (d)  $\text{Nb-TiO}_2\text{-0.4}$  between 100 and 200  $\text{cm}^{-1}$ .

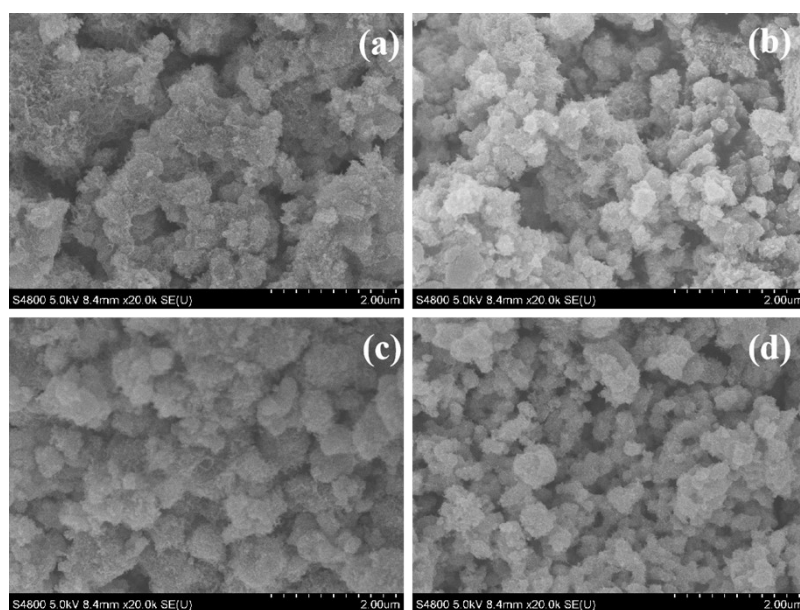

Fig.S5 SEM images of (a) TiO<sub>2</sub>, (b) Nb-TiO<sub>2</sub>-0.1, (c) Nb-TiO<sub>2</sub>-0.2 and (d) Nb-TiO<sub>2</sub>-0.4 .

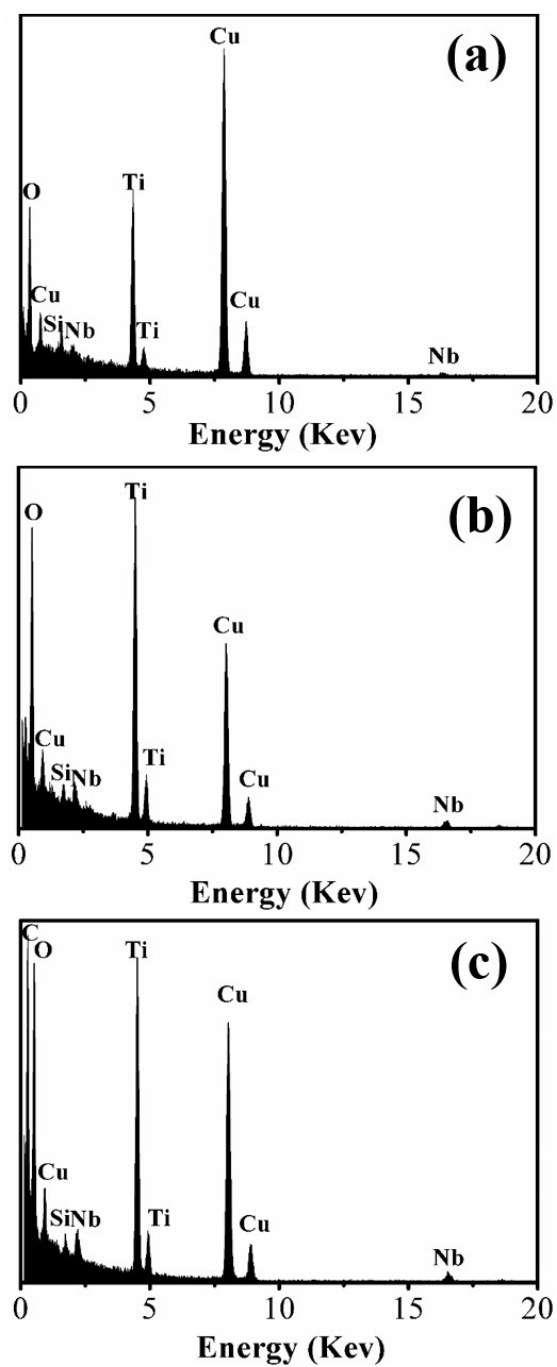

Fig.S6 EDX analysis of (a) Nb-TiO<sub>2</sub>-0.1, (b) Nb-TiO<sub>2</sub>-0.2 and (c) Nb-TiO<sub>2</sub>-0.4.

Table S1 ICP-OES data of Nb-TiO<sub>2</sub>-0.1, Nb-TiO<sub>2</sub>-0.2 and Nb-TiO<sub>2</sub>-0.4.

|                          | Ti (mg L <sup>-1</sup> ) | Nb (mg L <sup>-1</sup> ) | The ratio of Nb to Ti (Atomic %) |
|--------------------------|--------------------------|--------------------------|----------------------------------|
| Nb-TiO <sub>2</sub> -0.1 | 7.200                    | 0.343                    | 2.37%                            |
| Nb-TiO <sub>2</sub> -0.2 | 7.361                    | 0.923                    | 6.44%                            |
| Nb-TiO <sub>2</sub> -0.4 | 7.548                    | 1.433                    | 9.76%                            |

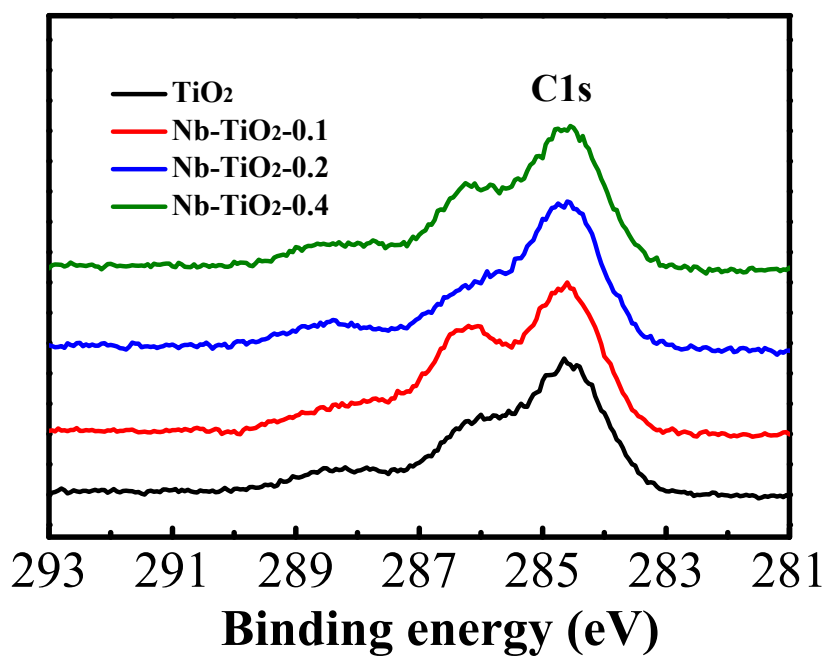Fig.S7 High-resolution XPS spectra of C1s for TiO<sub>2</sub>, Nb-TiO<sub>2</sub>-0.1, Nb-TiO<sub>2</sub>-0.2 and Nb-TiO<sub>2</sub>-0.4.

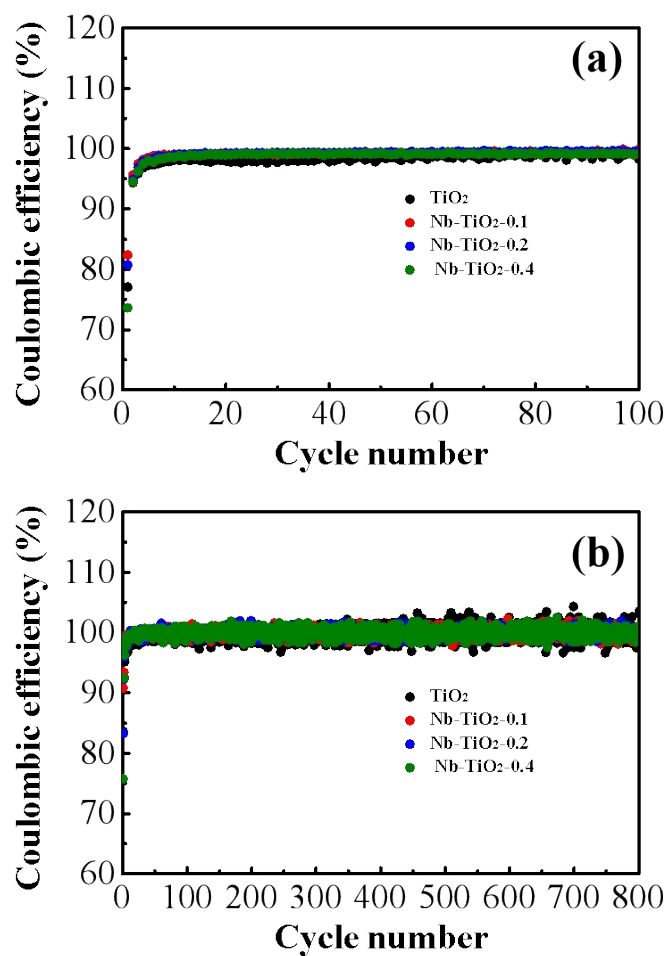

Fig.S8 Coulombic efficiency of TiO<sub>2</sub>, Nb-TiO<sub>2</sub>-0.1, Nb-TiO<sub>2</sub>-0.2 and Nb-TiO<sub>2</sub>-0.4 at (a) 1 C and (b) 10 C.

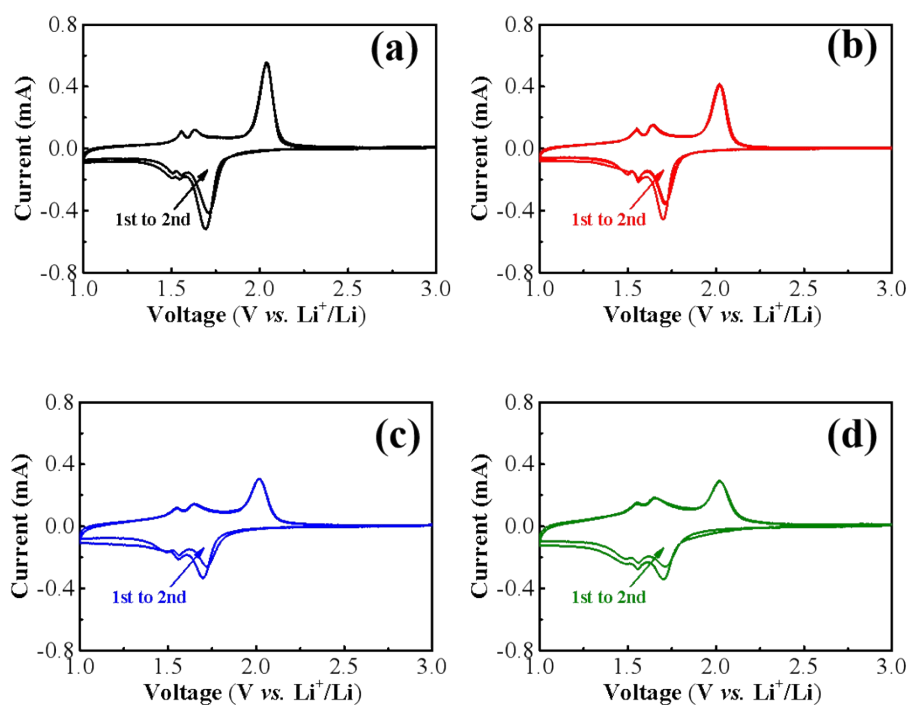

Fig.S9 CV curves of (a)  $\text{TiO}_2$ , (b)  $\text{Nb-TiO}_2\text{-0.1}$ , (c)  $\text{Nb-TiO}_2\text{-0.2}$  and (d)  $\text{Nb-TiO}_2\text{-0.4}$ .

Table S2  $\Delta E_p$  and Impedance parameters of  $\text{TiO}_2$ ,  $\text{Nb-TiO}_2\text{-0.1}$ ,  $\text{Nb-TiO}_2\text{-0.2}$  and  $\text{Nb-TiO}_2\text{-0.4}$ .

|                              | $\Delta E_p$ (mV) | $R_s$ ( $\Omega$ ) | $R_f$ ( $\Omega$ ) | $R_{ct}$ ( $\Omega$ ) |
|------------------------------|-------------------|--------------------|--------------------|-----------------------|
| $\text{TiO}_2$               | 334.3             | 2.17               | 2.01               | 34.6                  |
| $\text{Nb-TiO}_2\text{-0.1}$ | 307.9             | 1.81               | 1.33               | 16.3                  |
| $\text{Nb-TiO}_2\text{-0.2}$ | 290.5             | 1.76               | 1.14               | 15.4                  |
| $\text{Nb-TiO}_2\text{-0.4}$ | 300.5             | 2.24               | 0.87               | 18.5                  |
